# Supplementary material
Source: publisher site journal article supplement (https://www.dovepress.com/article/592494)
Supplement: Supplementary file 1 [file 592494%20Revised%20Supplementary%20Qualitative%20Questions.docx]

Title: **Factors and Challenges Affecting Research Output of Medical Students**

Qualitative Part (semi-structured interview)

**Questions for students**

- Grand tour: **The general experience of the research program.**
  - Question: can you provide a general view on your experience with the research program at the COM-J?
    - Prompts: *rewarding, burden, value, interest*
- Core question 1: **The characteristics of the research topic.**
  - Question: how was your experience with the selection of the research topic?
    - Prompts: *previous preferences,* *random, supervisor suggestions*
- Core question 2: **The efficacy of the skills taught in the research blocks.**
  - Question: can you describe how helpful were the theoretical and applied materials taught in the block in allowing you to properly execute the research project steps (*relevance to the practical part, clarity of the materials, efficacy of delivery)*?
- Domain 2: **The mentoring by supervisors and co-supervisor.**
  - Question: can you describe how effective was the mentoring by the supervisors in guiding you throughout the project (*ease of reach, value of experience, effectiveness of feedback, interventions to deal with difficulties*)?
- Domain 3: **The support services from the research unit.**
  - Question: can you describe how important was the support services received from the office of the research unit (*speed and quality of service, qualification of the personnel, cooperativeness, understanding the challenges*)?
- Domain 4: **The effective teamwork among group members**.
  - Question: can you describe how the cooperation between the group members influenced the progress of the research project (*level of individual contribution, solving problems, initiative, cognitive and emotional support, dealing with disagreements*)?
- Domain 5: **The level of motivation among group members**.
  - Question: can you describe how the motivation among the group members was during the two-year of the research project (*the level of motivation, the drive for motivation, the involvement of motivation in project completion, the dominance of highly motivated students*)?

**Questions for Supervisors**

- Grand tour: **The general experience of the research program.**
  - Question: can you provide a general view on your experience with the research program at the COM-J?
    - Prompts: *rewarding, burden, interaction with supervisors and students*
- Core question 1: **The characteristics of the research projects.**
  - Question: can you describe how the characteristics of the student research projects affect the timely completion and publication? (*research fields, design, subjects, complexity*)?
  - Question: can you describe the role of accessibility to funding for student projects (*the necessity for quality student research output)*, obtaining quality patient data (*the role of experience in extracting patient data for research purposes)*, and recruiting participants *(for prospective research projects)*?
- Core question 2: **The characteristics of the supervisors and co-supervisors.**
  - Question: can you describe how supervisors and co-supervisors had influenced timely completion and publication of your research projects?
    - Prompts: *gender, affiliation, speciality, work experience, research profile, efficacy of the student feedback and evaluation, response to communication, attendance of student presentations, discussion of challenges, reporting of incidences, retainment of student research records*
- Core question 3: **The role of the university/RU**.
  - Question: can you describe the university role in promoting the culture of good quality student research works and clinician involvement in supervising student research projects (*faculty enhancement activities; availability, relevance of offered topics, quality of delivery, proper announcement and timing of events; facilitating your tasks in supervising student research projects*)?
- Core question 3: **The characteristics of the students.**
  - Question: can you describe how student characteristicsmay influence timely completion and publication of student research projects (*previous education, research experience, gender*)?
- Unplanned questions
  - Question: can you describe the willingness of student to seek support from the RU office to help with proper progress and dealing with challenges (*frequency of requests, the time of seeking the support, the timeframe for response to student requests, the types of sought support, the match of the sought support with your capabilities*)?

**Questions for the personnel at the office of the Research Unit**

- Grand tour: **The general experience of the research program.**
  - Question: can you provide a general view on your experience with the research program at the COM-J?
    - Prompts: *rewarding, burden, interaction with supervisors and students*
- Core question 1: **The characteristics of the students.**
  - Question: can you describe how student characteristicshad influenced timely completion and publication of student research projects? (*previous education, research experience, gender*)?
- Core question 2: **The characteristics of the supervisors and co-supervisors.**
  - Question: can you describe how supervisors and co-supervisors had influenced timely completion and publication of student research projects (*gender, affiliation, speciality, work experience, and research profile*, *efficacy of the student feedback and evaluation, response to communication, attendance of student research progress presentations, discussion of challenges, reporting of incidences, retainment of student research records, authorship agreement with students*)?
- Core question 3: **The characteristics of the research projects.**
  - Question: can you describe how the characteristics of the student research projects affect the timely completion and publication? (*research fields, design, subjects, complexity*)?
- Core question 1: **The communication of the student research output.**
  - Question: can you describe how you see the level and quality of communication activities of the student research works? (*presentations on scientific events, publication, quality of communicated materials*)?
- Planned follow up questions:
  - Question: can you describe the willingness of student to seek support from the RU office to help with proper progress and dealing with challenges (*frequency of requests, the time of seeking the support, the timeframe for response to student requests, the types of sought support, the match of the sought support with your capabilities*)?
  - Question: can you describe the willingness of student to seek support from the RU office to help with proper progress and dealing with challenges (*frequency of requests, the time of seeking the support, the timeframe for response to student requests, the types of sought support, the match of the sought support with your capabilities*)?
- Domain 3: **The role of student motivation in facilitating supervisor tasks.**
  - Question: can you describe how student motivation toward their research project influenced your supervision tasks (*the level of student motivation, the effect on effective coordination and communication between members and with supervisor, the awareness of research importance in their study and career, range of `topics of interest*)?
- Domain 4: **The ease of access to fund, quality patient data, or participants.**
  - Question: can you describe the role of accessibility to funding for student projects (*the necessity for quality student research output)*, obtaining quality patient data (*the role of experience in extracting patient data for research purposes)*, and recruiting participants *(for prospective research projects)*?
- Domani 5: **The role of the university**.
  - Question: can you describe the university role in promoting the culture of good quality student research works and clinician involvement in supervising student research projects (*faculty enhancement activities; availability, relevance of offered topics, quality of delivery, proper announcement and timing of events; facilitating your tasks in supervising student research projects*)?
- Domain 1: **The role of timely progress of student tasks.**
  - Question: can you determine whether the timely submission of student tasks has an impact on successful completion and publication of their research project, and how (*student* *tracking of deadlines, proper announcement, consequences of delays*)?
- Domain 2: **The influence of student initiatives.**
  - Question: can you describe how student initiative involved in driving the progress and overcoming difficulties of the research project tasks (*student assumption of responsibilities*, *level of reliance on* *RU personnel, willingness to take necessary actions to help the proper progress of the project*)?
- Domain 3: **The seeking of student support from the research unit.**
  - Question: can you describe the willingness of student to seek support from the RU office to help with proper progress and dealing with challenges (*frequency of requests, the time of seeking the support, the timeframe for response to student requests, the types of sought support, the match of the sought support with your capabilities*)?
- Domain 4: **The cooperation of supervisors with the office of the Research Unit.**
  - Question: can you assess the cooperativeness of the student research supervisors with the students and the RU office (*efficacy of the student feedback and evaluation, response to communication, attendance of student research progress presentations, discussion of challenges, reporting of incidences, retainment of student research records, authorship agreement with students*)?
